# Supplementary figures and images for: PFKFB3 Inhibition Attenuates Oxaliplatin-Induced Autophagy and Enhances Its Cytotoxicity in Colon Cancer Cells
Source: MDPI journal article supplement (doi:10.3390/ijms20215415), 2019-10-30

Figure S3

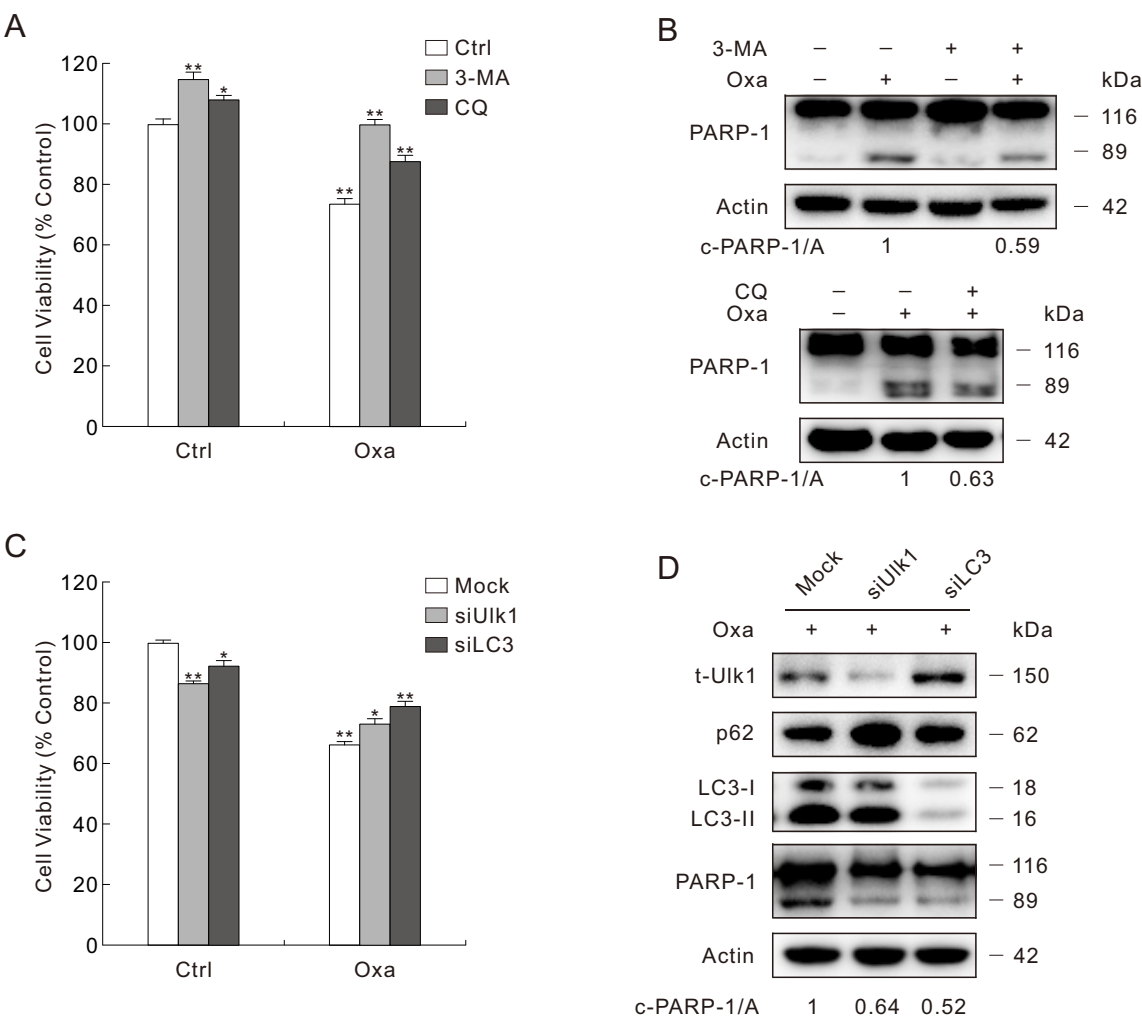

Supplement: s1 [file s1]

Figure S6

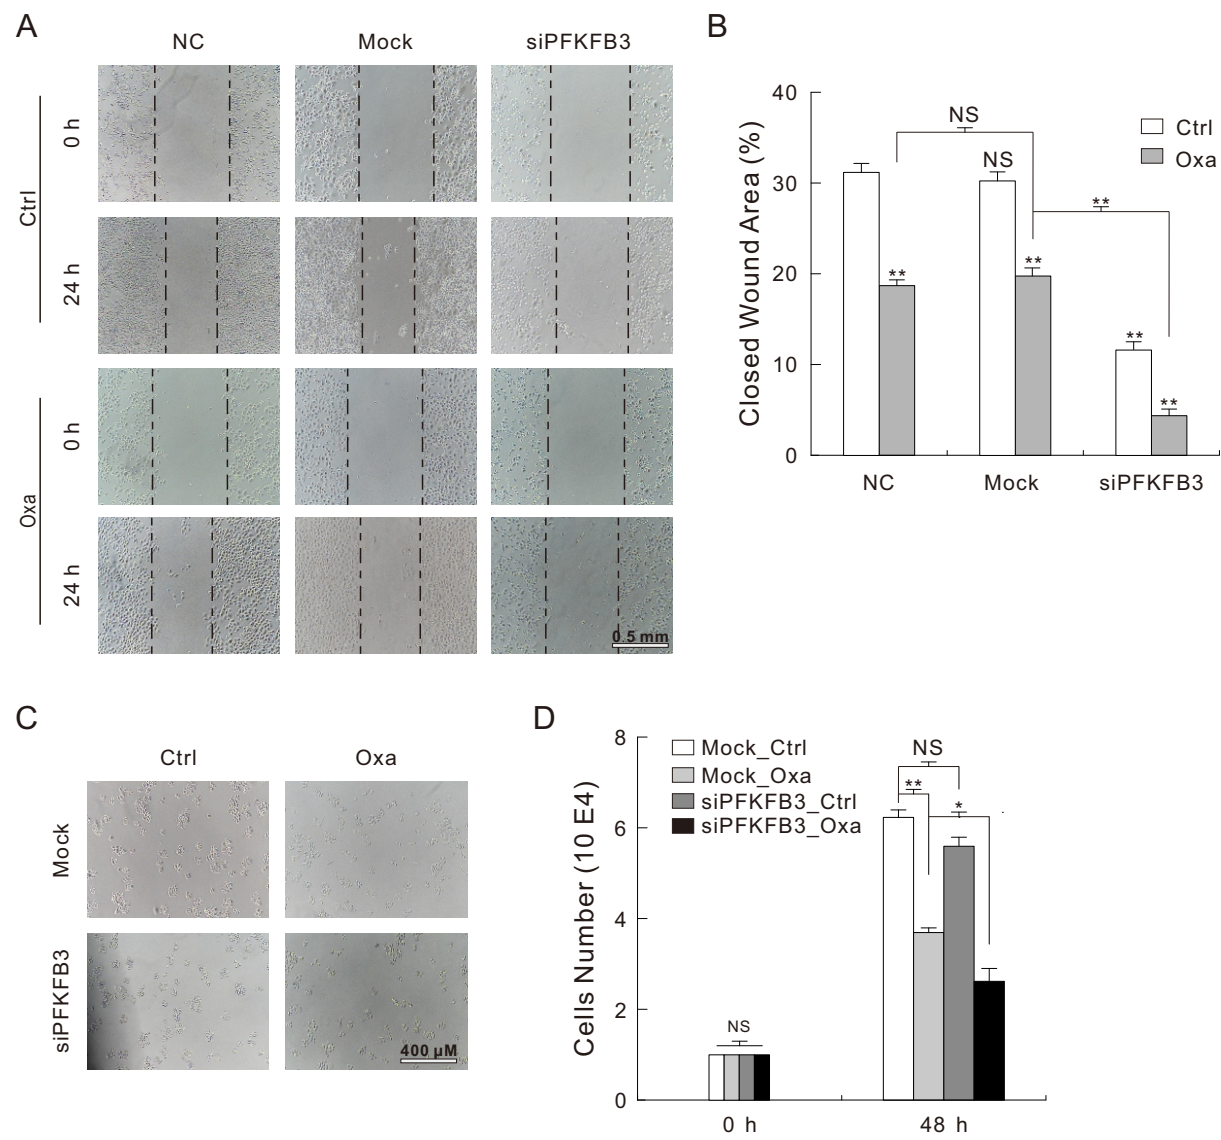

Supplement: s1 [file s1]

Figure S4

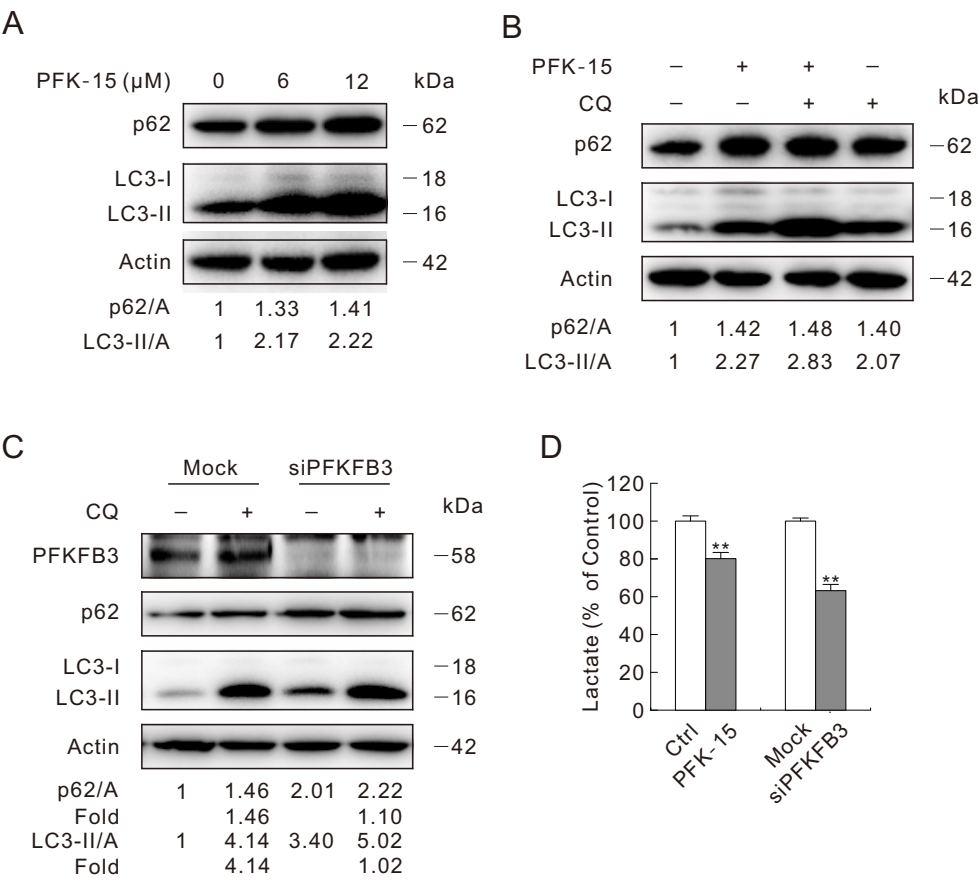

50  $\mu$ M 1h

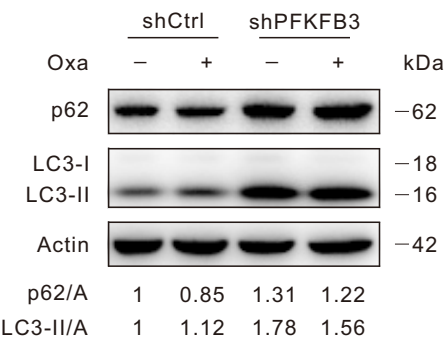

Supplement: s1 [file s1]

Figure S1

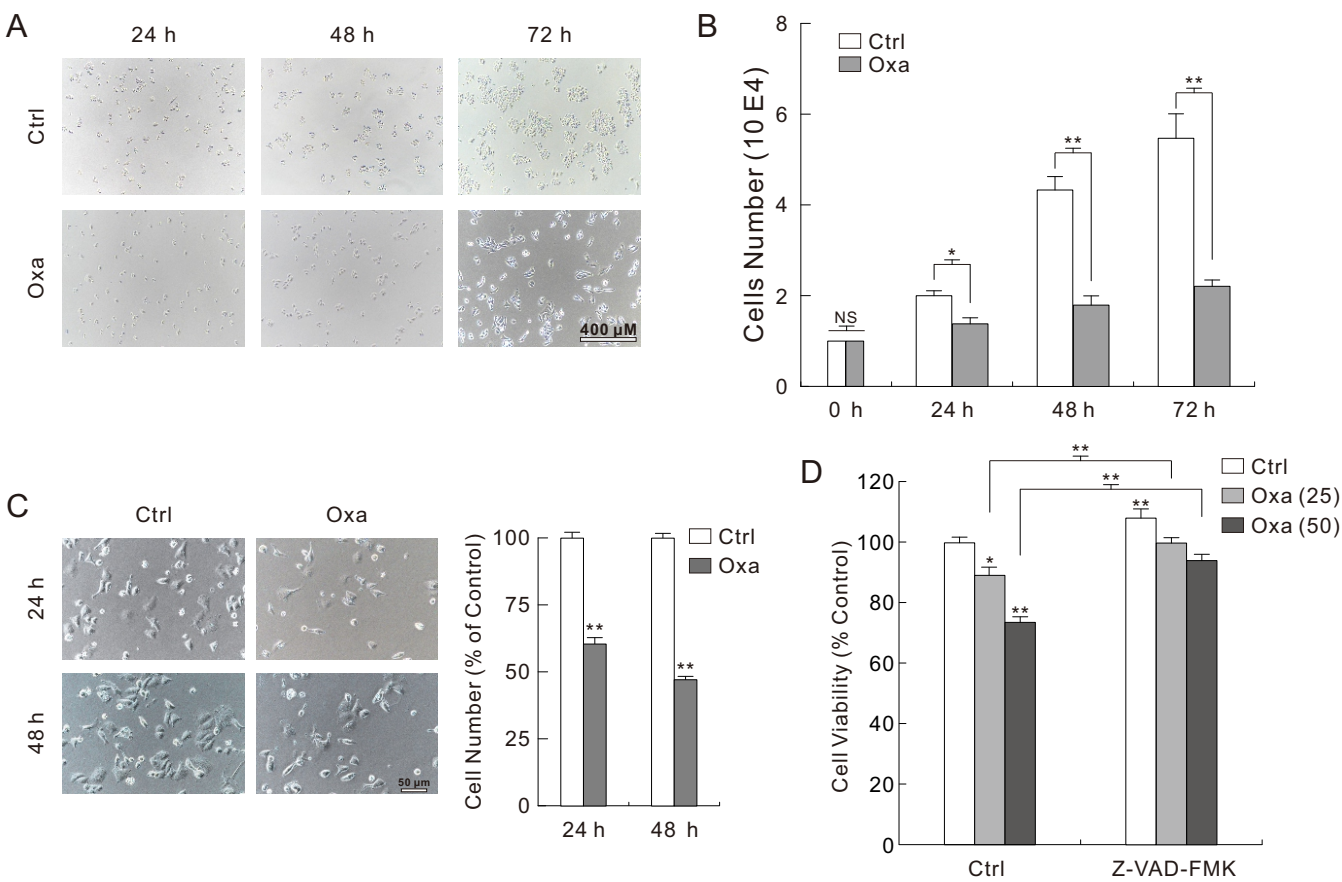

Supplement: s1 [file s1]

Figure S2

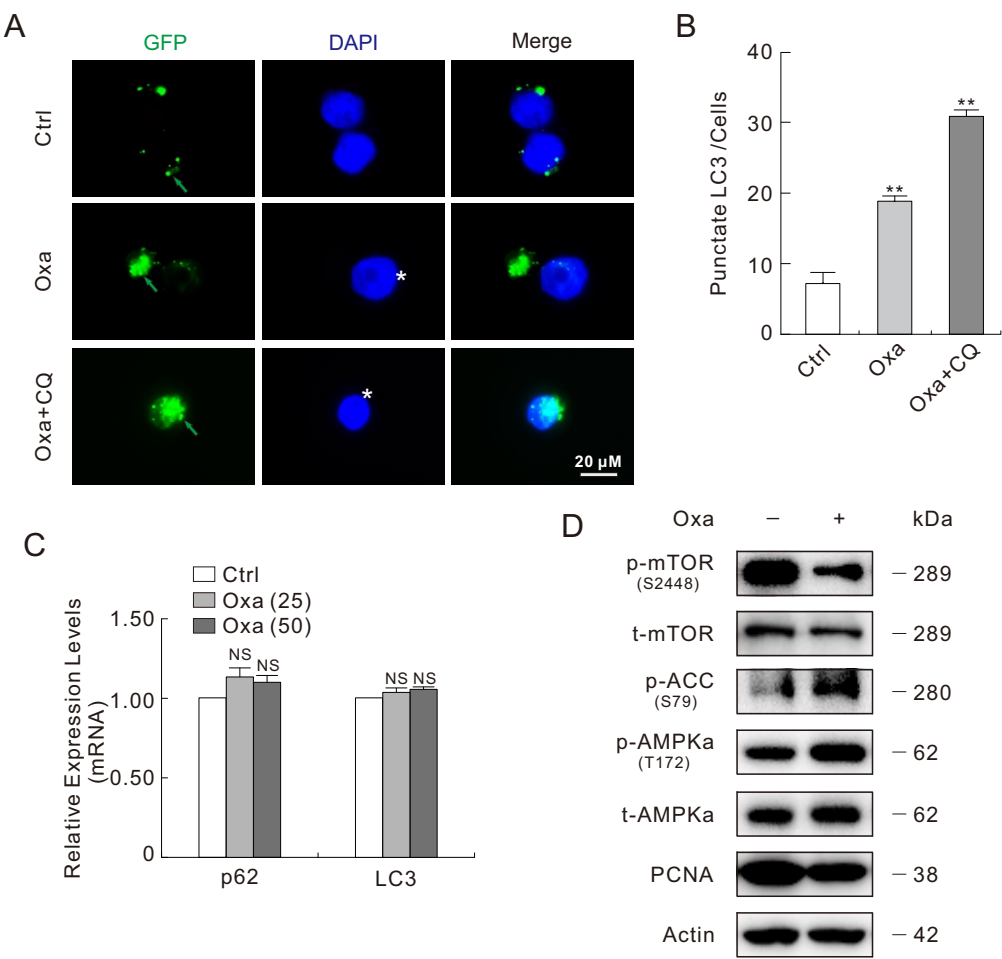

Supplement: s1 [file s1]

Figure S5

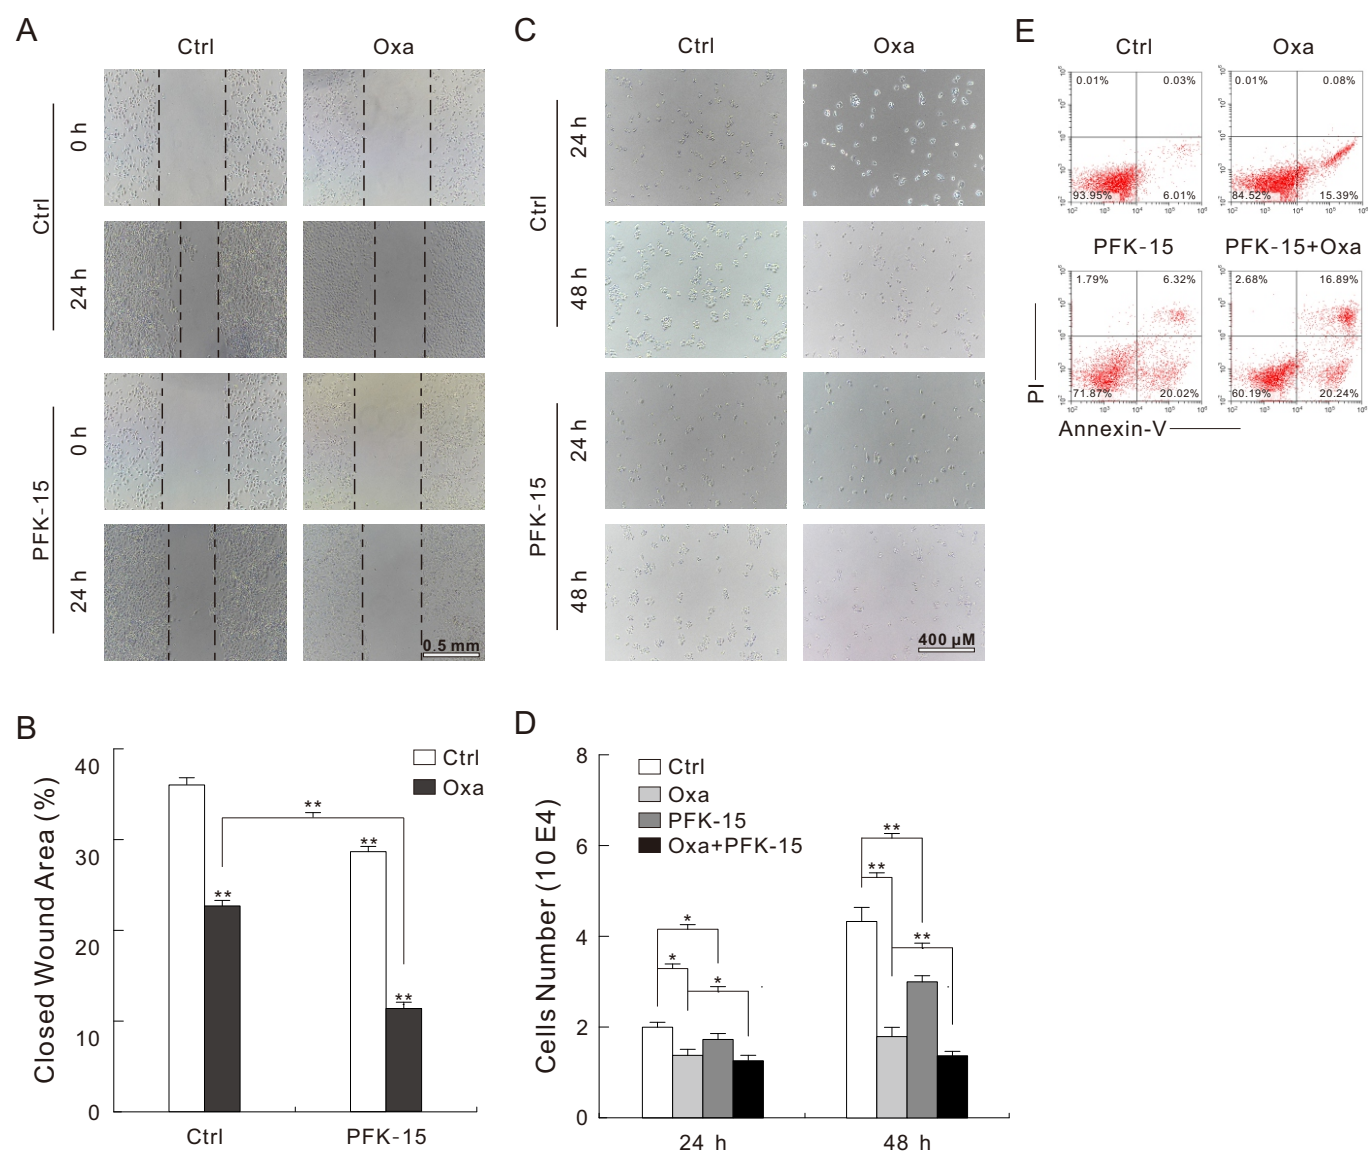

Supplement: s1 [file s1]
